# Supplementary material for: History of hematopoietic cell transplantation: challenges and progress
Source: PubMed Central journal article supplement — Haematologica. 2020 Oct 9;105(12):2716–29. doi: 10.3324/haematol.2019.245688 (PMC7716373; doi:10.3324/haematol.2019.245688), 2020-10-09
Supplement: 2019_245688-Disclosures_Contributions.pdf [file 2019_245688-Disclosures_Contributions.pdf]

Haematologica  
HAEMATOL/2019/245688  
Version 3

History of hematopoietic cell transplantation: challenges and progress

Noa Granot and Rainer Storb

Disclosures: The authors have no conflicts of interest in relation to this work.

Contributions: NG and RS wrote the manuscript.
